# Supplementary material
Source: publisher site journal article supplement (https://www.dovepress.com/article/464880)
Supplement: Supplementary file 1 [file get_supplementary_file.php]

**Supplementary figure S1:**

vWF derived from HCC cells promotes tumor migration through inducing glycolysis *in vitro*. (**A**) vWF expression data in HCC tumor and normal tissues from GEPIA dataset. (**B-C**) Efficiency of vWF KD, vWF OE and control vectors were analyzed by Western blotting in HepG2 and SMMC-7721 cells. **P*<0.05.

**
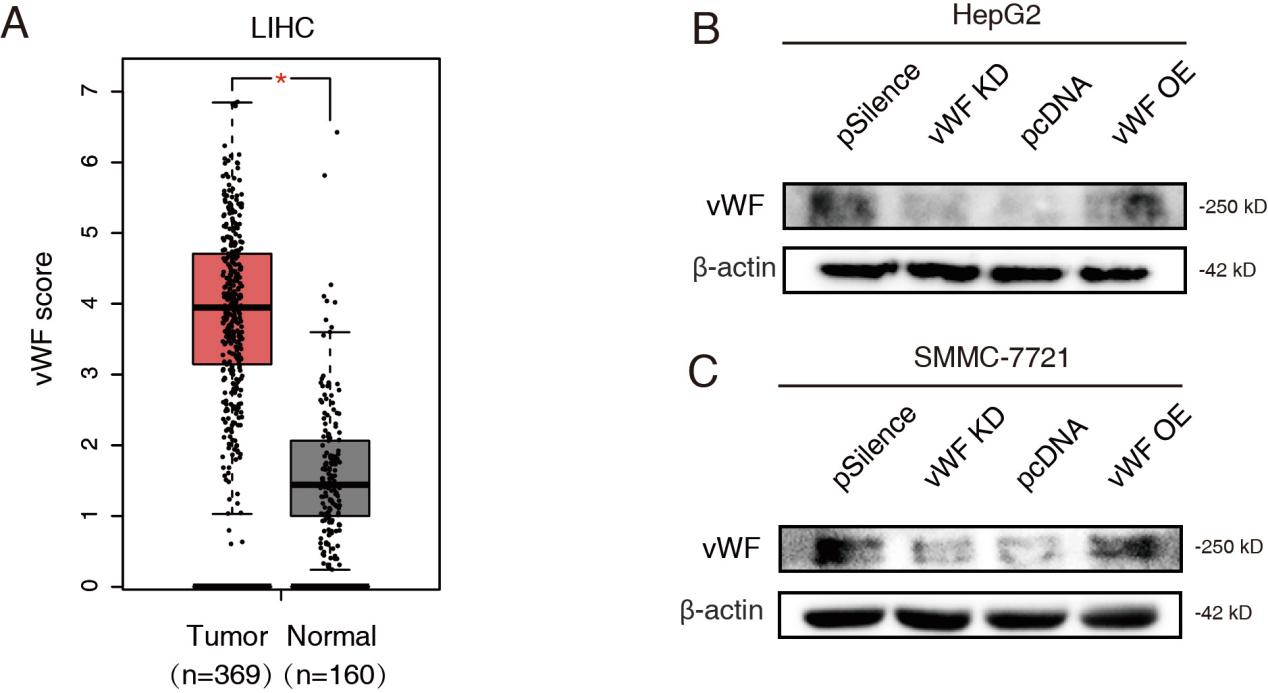
**

**Supplementary figure S2:**

IL-6/JAK1 signaling pathway activated by co-culture system regulates vWF mediated glycolysis and migration of HCC cells. (**A**) The concentrations of IL-6 in cell medium was detected by ELISA. (**B**) vWF expression levels in SMMC-7721 cells under the treatment of gradient concentrations of exogenous IL-6. (**C**) The phosphorylation levels of JAK2 in HCC cells with or without LX-2 cells co-culturing. (**D**) The effect of pyridone 6 on JAK1 phosphorylation under normal or co-culturing conditions was confirmed by Western blot. (**E**) Glycogen content of SMMC-7721 cells treating with vWF OE and pyridone 6 was detected by PAS staining. (**F-G**) Glycogen content of HepG2 and SMMC-7721 cells treating with vWF OE and pyridone 6 was detected by glycogen assays. (**H-I**) L-lactate content of HepG2 and SMMC-7721 cells treating with vWF OE and pyridone 6 was detected by L-lactate assays. (**J-K**) Migration ability of SMMC-7721 cells treating with vWF OE and pyridone 6 reflected by Wound-healing and Transwell assays. **P*<0.05, ***P*<0.01, ****P*<0.001; ns, no significance.

**
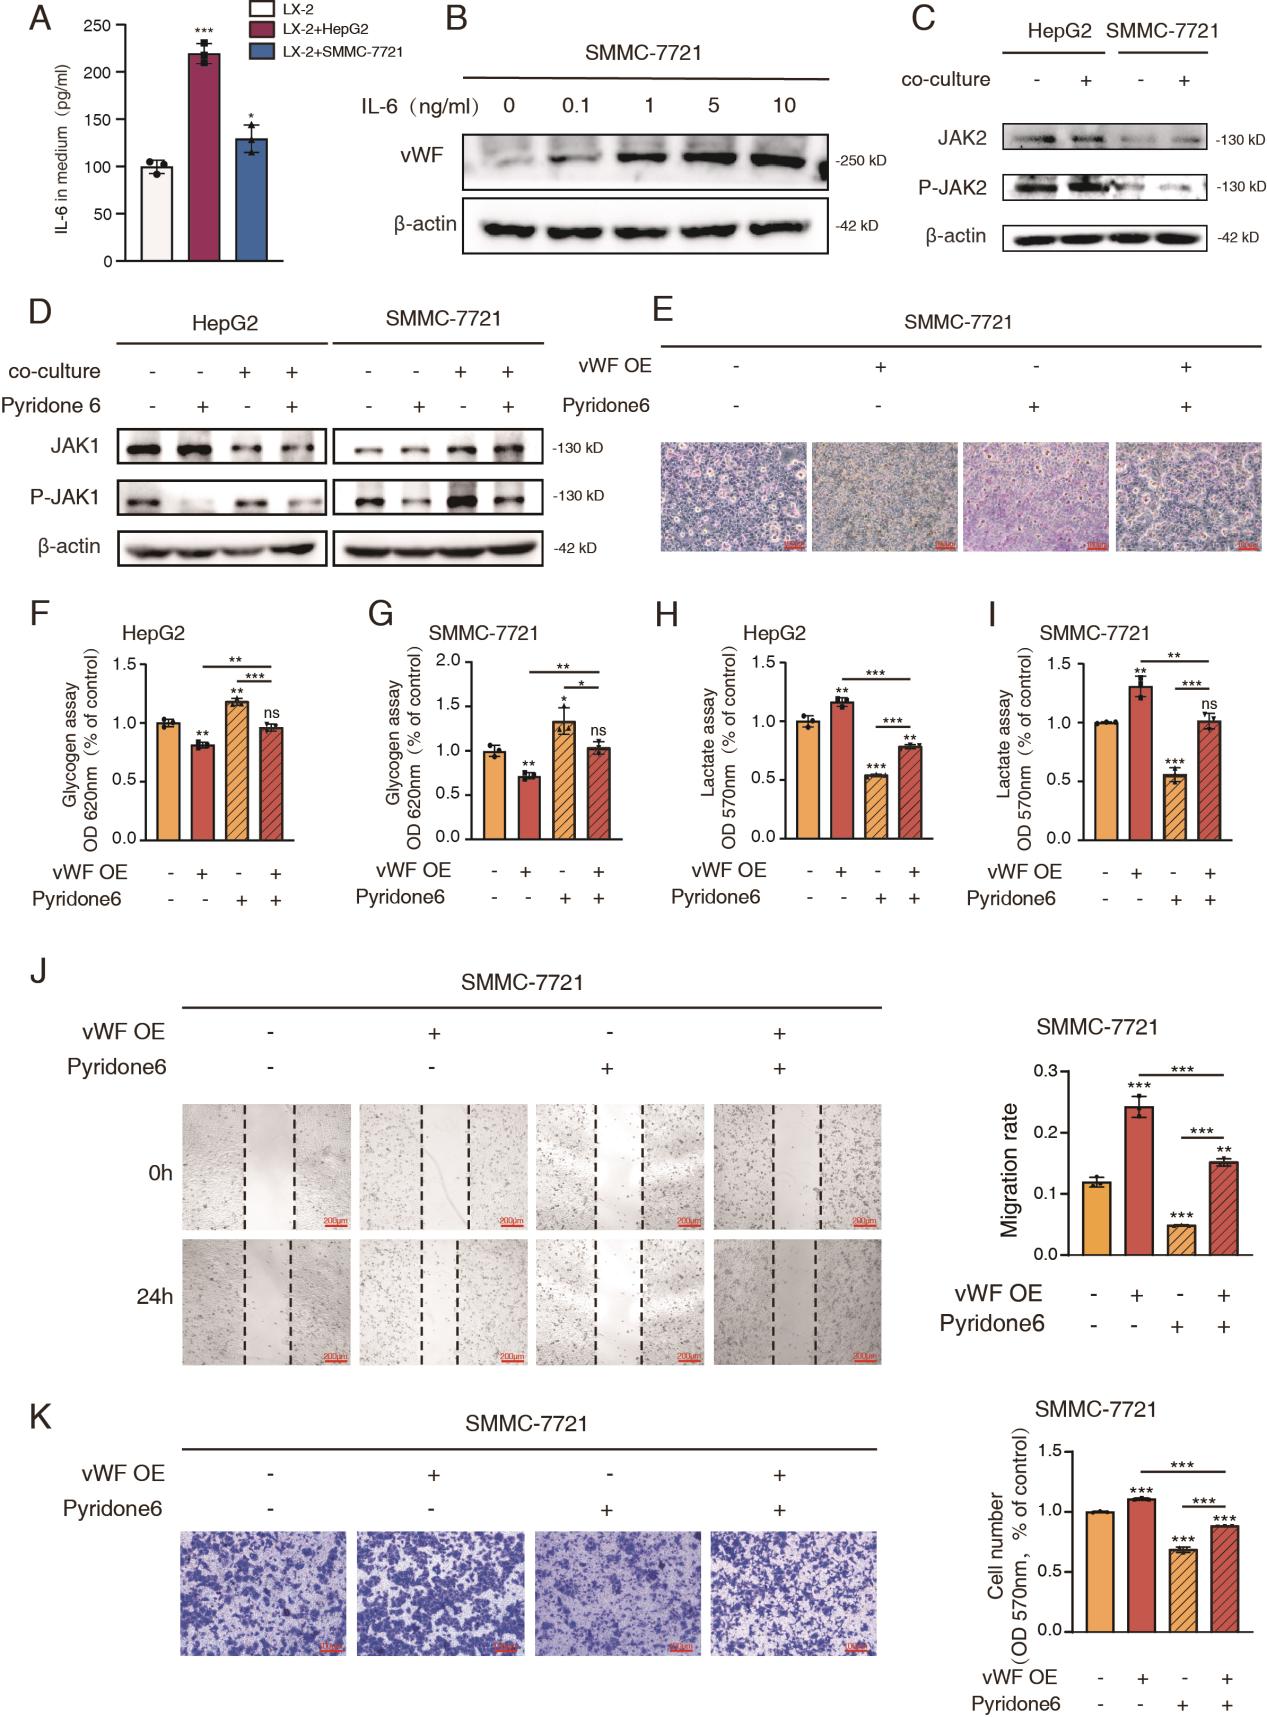
**

**Supplementary figure S3:**

LX-2 enhances vWF mediated TGFB1 expression and secretion by activating the JAK signaling pathway. (**A**) Relative mRNA expression data of PDGFB in HCC cells under pcDNA and vWF OE conditions. (**B**) Efficiency of si-TGFB1RII and si-control in LX-2 cells. (**C**) Efficiency of TGFB1 KD and control in HCC cells. (**D-E**) Functions of TGFB1 and TGFBR2 in mediating the migration ability of SMMC-7721 cells by Wound-healing. (**F-G**) Functions of TGFB1 and TGFB1RII in mediating the migration ability of SMMC-7721 cells by Transwell assays. **P*<0.05, ***P*<0.01, ****P*<0.001; ns, no significance.

**
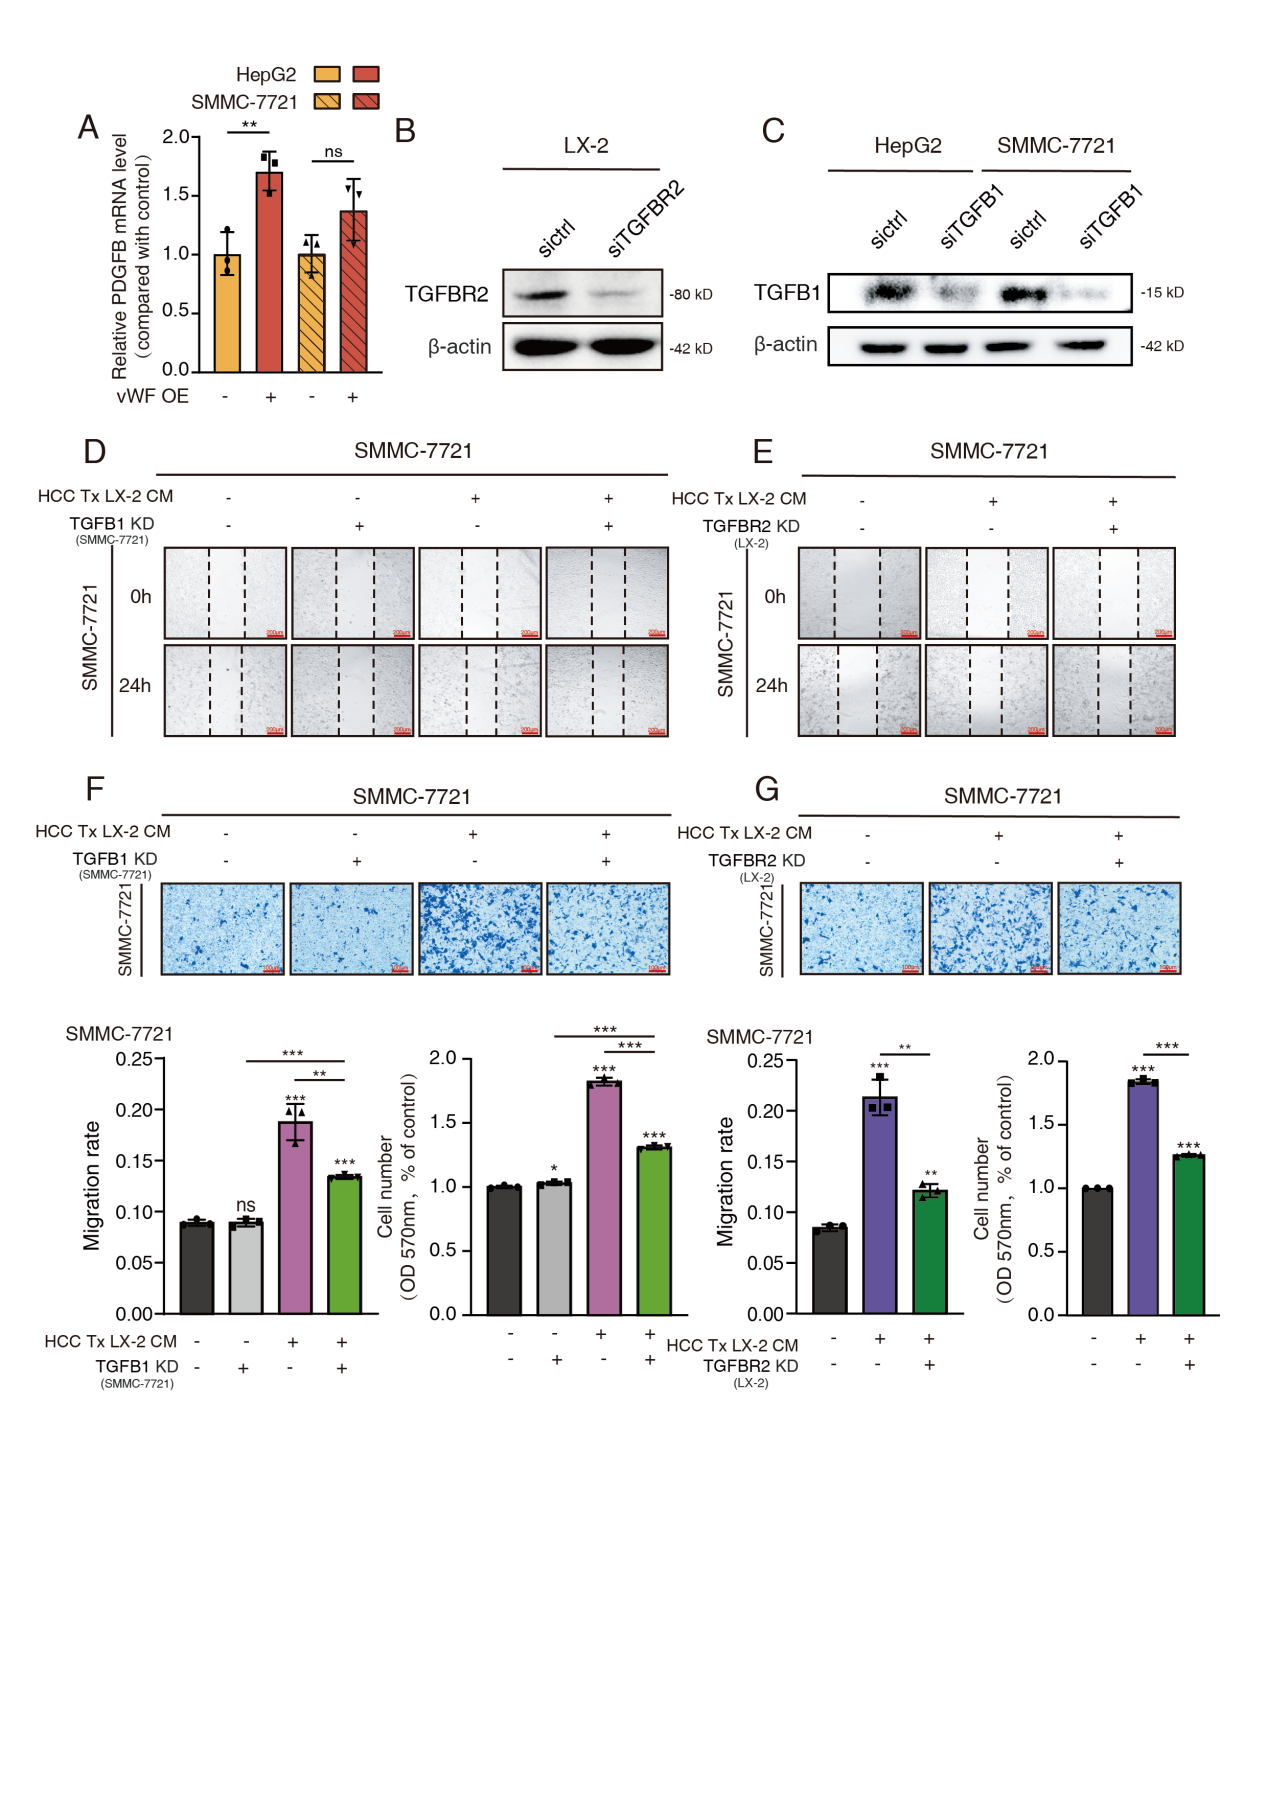
**

**Supplementary figure S4:**

TGFB1 derived from HCC cells promotes cancer cell migration and glycolysis through activating HSCs. SMMC-7721 cells transfected with vWF OE and si-TGFB1 or treated by pyridone 6 co-cultured with LX-2 cells transfected with si-TGFB1RII were used for (**A**) Western blot analysis of α-SMA levels of LX-2 cells; (**B-C**) Glycogen content reflected by PAS staining and glycogen assays; (**D**) L-lactate content tested by L-lactate assays; (**E-F**) Migration ability was examined by Wound-healing and Transwell assays. ***P*<0.01, ****P*<0.001; ns, no significance.

**
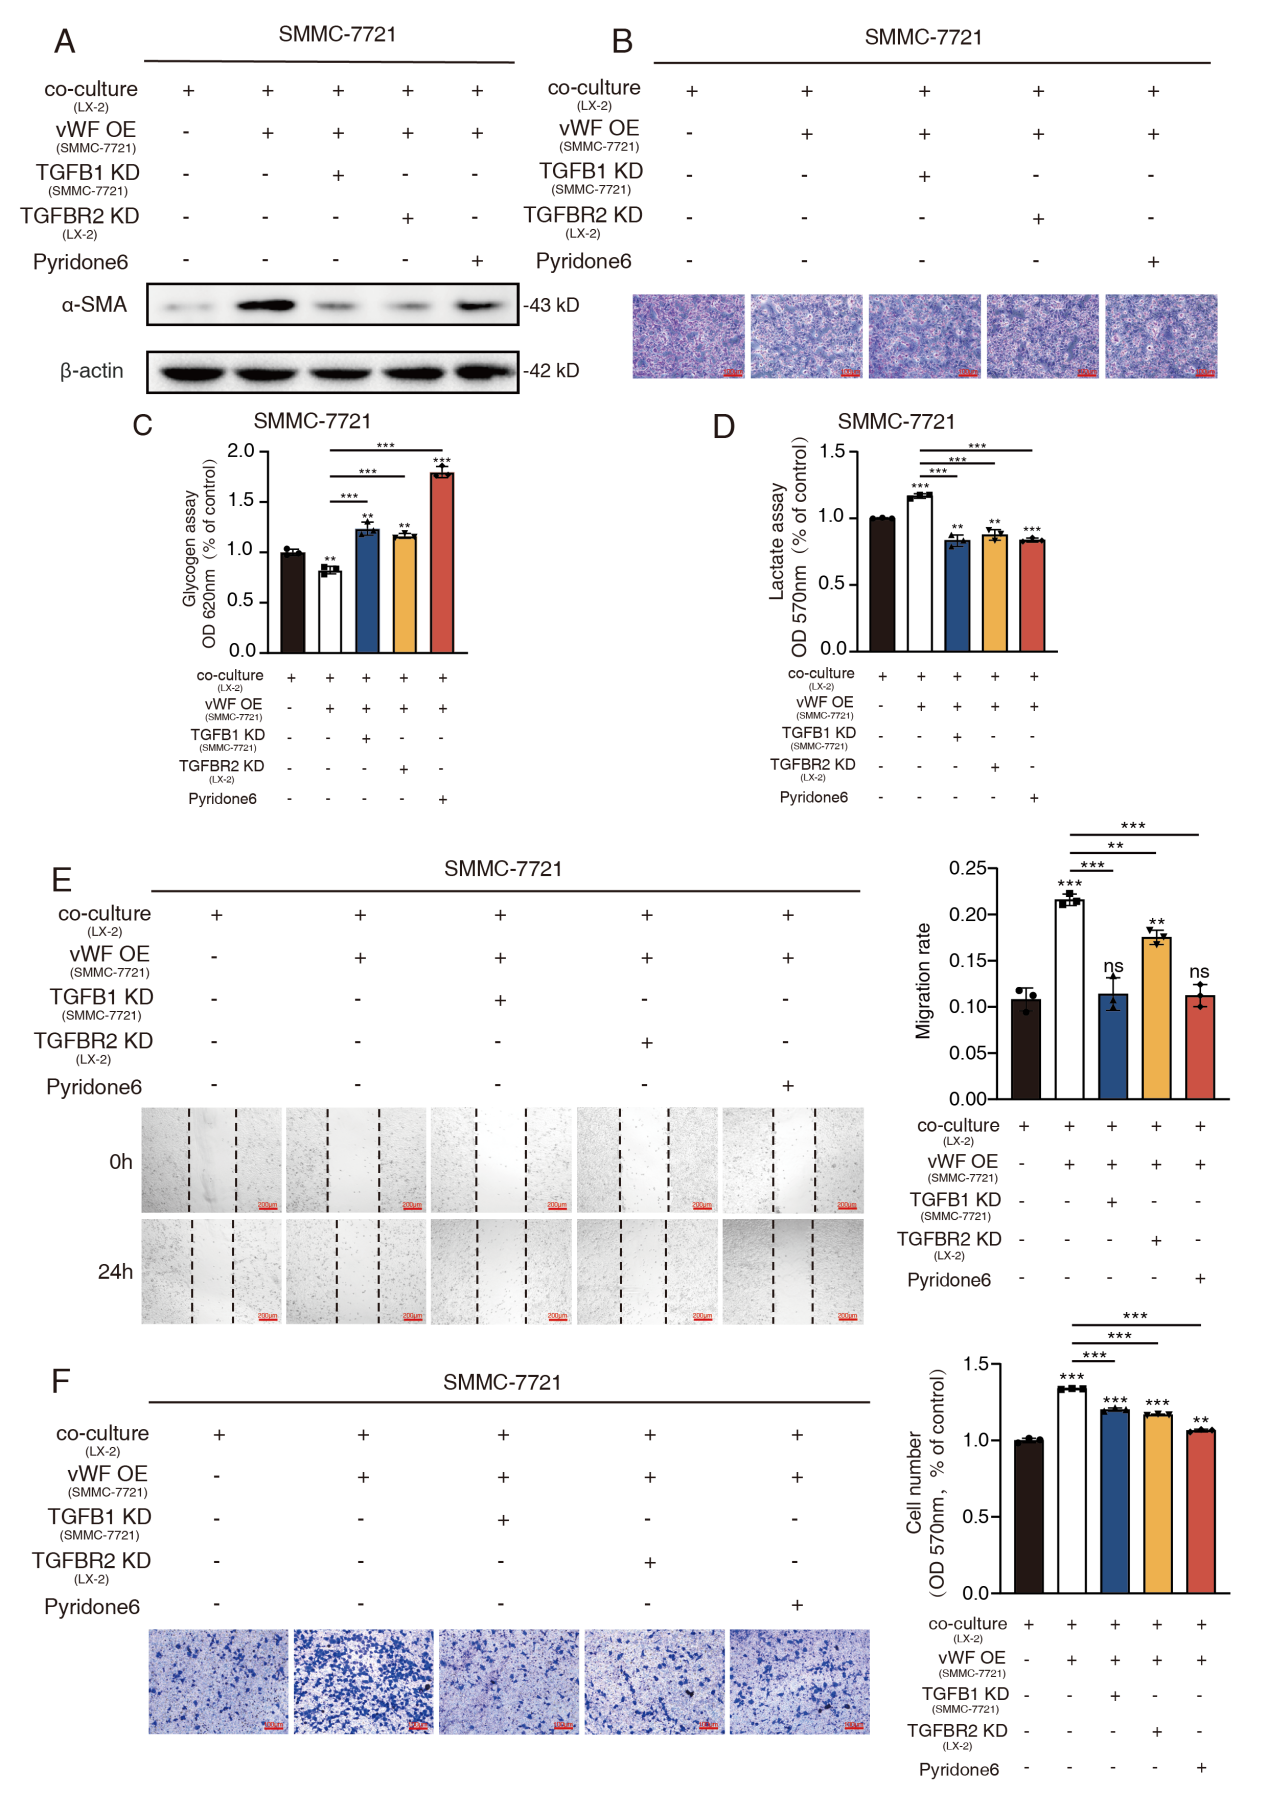
**

**Supplementary Table S1:**

**List of plasmids and lentivirus used for transfection**

| **Name** | **Sequence/Company** |
| --- | --- |
| vWF shRNA | 5'-GCCAGAGCCTGTCTATCAATGTTCAAGAGACATTGATAGAC  AGGCTCTGGCTTTTTT-3' |
| vWF OE plasmid | Addgene, MA, USA ( (#124794) |
| TGFB1 shRNA | 5'-CAAGCAGAGTACACACAGCAT-3' |
| TGFBR2 shRNA | 5'-AATGACGAGAACATAACACT-3' |

**Supplementary Table S2:**

**List of Primers used in PCR**

| **Gene name** | **Primers (5’-3’)** |  |
| --- | --- | --- |
| TGFB1 | forward | TGGTGGAAACCCACAACGAA |
|  | reverse | AGAAGTTGGCATGGTAGCCC |
| PDGFA | forward | CAGCGACTCCTGGAGATAGAC |
|  | reverse | GGACAGCTTCCTCGATGCTT |
| PDGFB | forward | GGAGTCGGCATGAATCGCT |
|  | reverse | AATGGGGTCCCCCTCGG |
| PDGFC | forward | AAATGAGCCTCTTCGGGCTT |
|  | reverse | TGAGGATCTTGTACTCCGTTCTG |
| PDGFD | forward | CTCAGGCGAGATGAGAGCAAT |
|  | reverse | GCACGTAGCCGTTTCCTTTC |
| VEGFA | forward | ACAAATGTGAATGCAGACCAAA |
|  | reverse | ACCAACGTACACGCTCCAG |
| CTGF | forward | CGCACAAGGGCCTATTCTGT |
|  | reverse | GAGCACCATCTTTGGCGGT |
| GAPDH | forward | GTCAGCCGCATCTTCTTTTG |
|  | reverse | GCGCCCAATACGACCAAATC |

**Supplementary Table S3:**

**List of antibodies used in western blot (WB)**

| **Antibody name** | **Company** | **Application** |
| --- | --- | --- |
| Anti-vWF | SantaCruz Biotechnology, (#sc-53466) | WB/IHC |
| Anti-TGFB1 | Wanleibio, (WL02193) | WB/IHC |
| Anti-α-actin | Wanleibio, (WL02510) | WB/IHC |
| Anti-IL-6 | Wanleibio, (WL02841) | WB |
| Anti-JAK1 | Abways TECHOLOGY, (CY7173) | WB |
| Anti-p-JAK1 | Abways TECHOLOGY, (CY10423) | WB |
| Anti-JAK2 | Abways TECHOLOGY, (CY5287) | WB |
| Anti-p-JAK2 | Abways TECHOLOGY, (CY6570) | WB |
| Anti-TGFBR2 | Wanleibio, (WL02714) | WB |
| Anti-β-actin | Affinity Biosciences, (AF7018) | WB |
